# Supplementary material
Source: Springer Nature journal article supplement (http://www.springermedizin.de/resource/supplementary/12967_2013_1689_MOESM1_ESM.pdf/9574652)
Supplement: MOESM1 [file 9574652]

## Additional Files

**Table S1. Demographics of plasma donors**

| Organ system     | Clinical diagnosis                 | Number | Cancer Stage<br>(# of Patients) | Sex<br>Male<br>/Female | Age<br>Average±SD |
|------------------|------------------------------------|--------|---------------------------------|------------------------|-------------------|
| Gastrointestinal | Esophageal cancer (EC)             | 10     | 1(2), 2(8)                      | 8/2                    | 56.8±2.5          |
|                  | Gastric cancer (GC)                | 10     | 1(2), 2(8)                      | 1/9                    | 55.8±3.3          |
|                  | Colon cancer (CC)                  | 10     | 1(3), 2(7)                      | 8/2                    | 57.8±2.7          |
|                  | Crohn's disease (CD)               | 10     | NA                              | 5/5                    | 53.3±9.4          |
| Pulmonary        | Asthma                             | 10     | NA                              | 0/10                   | 61.4±12.0         |
|                  | Pneumonia                          | 10     | NA                              | 6/4                    | 51.9±7.8          |
|                  | Non-small cell lung cancer (NSCLC) | 10     | 1(2), 2(2), 3(3),<br>4(3)       | 3/7                    | 58.5±3.6          |
|                  | Controls                           | 30     | NA                              | 26/4                   | 63.7±4.0          |

NA – Not Applicable; SD – Standard Deviation

**Table S2. miRNA used in the study**

| miRNA              | Enriched in GI             | Enriched in lung | Involved in cancer | Involved in inflammation | Under-expressed in | AB Catalog Assay ID |
|--------------------|----------------------------|------------------|--------------------|--------------------------|--------------------|---------------------|
| <i>miR-17-5p</i>   |                            |                  | +                  |                          |                    | 002308              |
| <i>miR-30e-3p</i>  | Ubiquitous                 |                  |                    |                          |                    | 000422              |
| <i>miR-31</i>      |                            |                  | +                  | +                        |                    | 002279              |
| <i>miR-34b</i>     |                            | +                |                    |                          | GI                 | 002102              |
| <i>miR-126</i>     |                            |                  | +                  | +                        |                    | 002228              |
| <i>miR-142-5p</i>  |                            | +                |                    |                          |                    | 002248              |
| <i>miR-145</i>     | +                          |                  |                    |                          |                    | 002278              |
| <i>miR-146b-5p</i> |                            | +                | +                  | ?                        |                    | 001097              |
| <i>miR-148a</i>    | +                          |                  | +                  |                          |                    | 000470              |
| <i>miR-155</i>     |                            | +                | +                  | +                        |                    | 002623              |
| <i>miR-181a</i>    | Ubiquitous, brain-enriched |                  |                    |                          |                    | 000480              |
| <i>miR-192</i>     | +                          |                  |                    |                          |                    | 000491              |
| <i>miR-194</i>     | +                          |                  |                    |                          |                    | 000493              |
| <i>miR-203</i>     | +                          |                  |                    |                          |                    | 000507              |
| <i>miR-215</i>     | +                          |                  |                    |                          | Lung               | 000518              |
| <i>miR-223</i>     |                            | +                | ?                  | +                        |                    | 002295              |
| <i>miR-409-3p</i>  | Ubiquitous                 |                  |                    |                          | Lung               | 002332              |
| <i>miR-486-5p</i>  |                            | +                |                    |                          |                    | 001278              |

### **Figure S1**

#### **Differentiation of GI pathologies from controls by miRNA biomarker pairs.**

The concentrations of miRNAs in plasma samples from patients with four GI pathologies, and from healthy donors were measured by RT-qPCR and the ratios of various miRNAs were calculated as  $2^{-\Delta Cq} \times 100$ . A-G – box-plots; A-F – individual pathologies (10 patients in each group) against controls (30 subjects); G – combined GI pathologies (40 patients total) against controls (30 subjects). All notations are as in Fig.1. H – Receiver-Operating Characteristic (ROC) curve for differentiation between patients with four GI pathologies and controls obtained with different biomarker pairs. All statistical analyses are performed as in Fig.1.

### **Figure S2**

#### **Differentiation of PS pathologies from controls by miRNA biomarker pairs.**

The concentrations of miRNAs in plasma samples from patients with three PS pathologies, and from healthy donors were measured by RT-qPCR and the ratios of various miRNAs were calculated as  $2^{-\Delta Cq} \times 100$ . A-H, I and K – box-plots; A-H – individual pathologies (10 patients in each group) against controls (20 subjects); I and K – combined PS pathologies (30 patients total) against controls (20 subjects). J and L – Receiver-Operating Characteristic (ROC) curves of differentiation between patients with three PS pathologies and controls obtained with different biomarker pairs. All statistical analyses are performed as in Fig.1.

### **Figure S3**

#### **Receiver-Operating Characteristic (ROC) curve analysis for differentiation between particular diseases of one organ system and combined pathologies of another organ system, obtained with different biomarker pairs.**

The areas under the ROC curve (AUC) are reported. The statistical analysis is performed as in Fig.1.

### **Figure S4**

#### **Receiver-Operating Characteristic (ROC) curve analysis for differentiation of cancer(s) from inflammatory disease(s) of GI (A) and PS (B), obtained with different biomarker pairs.**

A – Patients with Crohn's disease versus patients with cancers of the GI system; B – Patients with lung cancer versus patients with either asthma or pneumonia. The areas under the ROC curve (AUC) are reported. The statistical analysis is performed as in Fig.1.

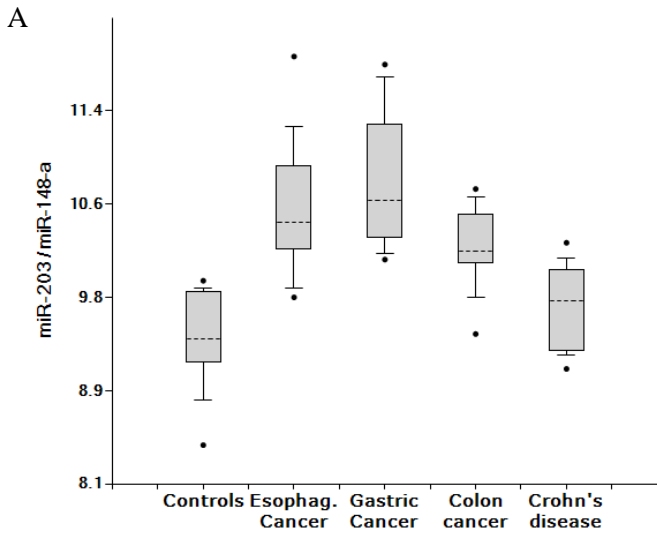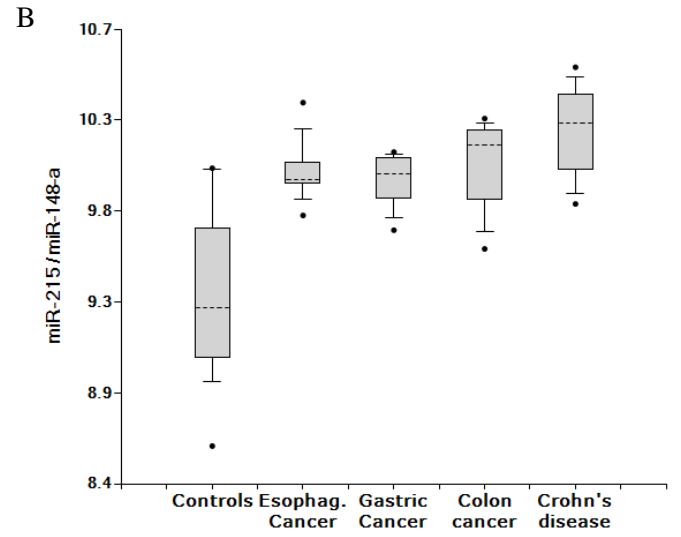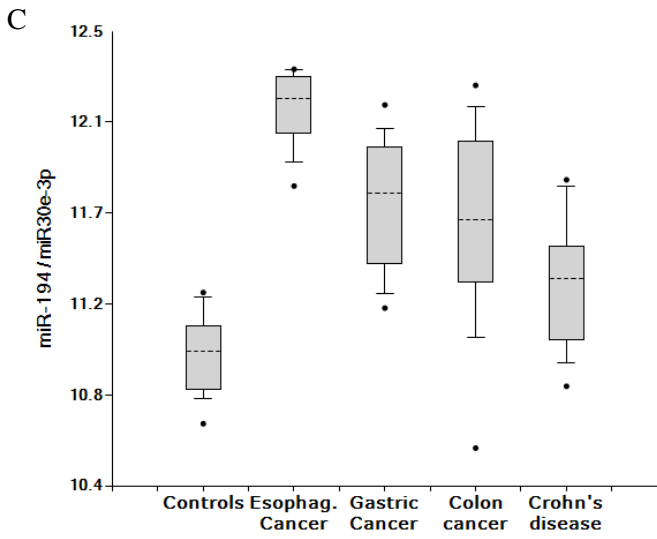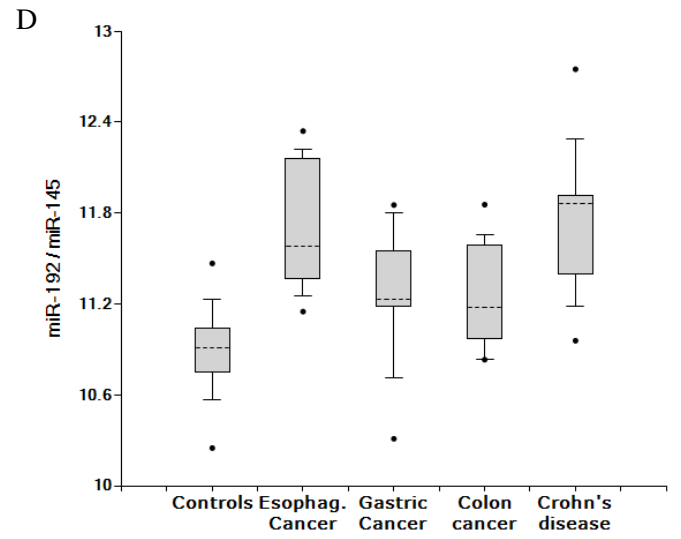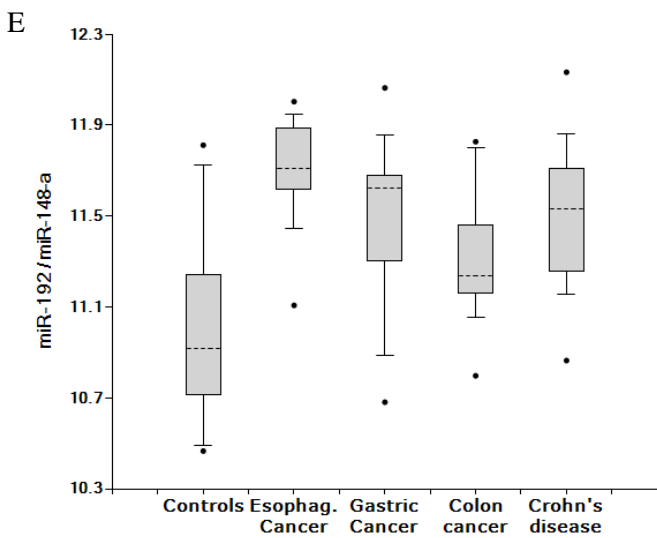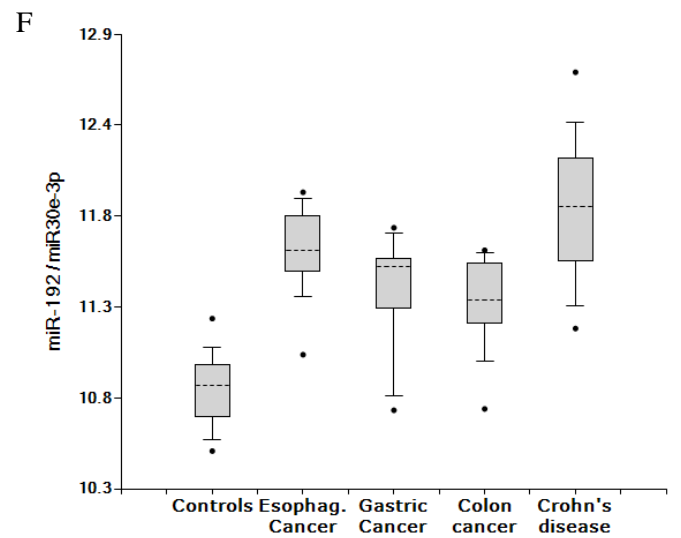

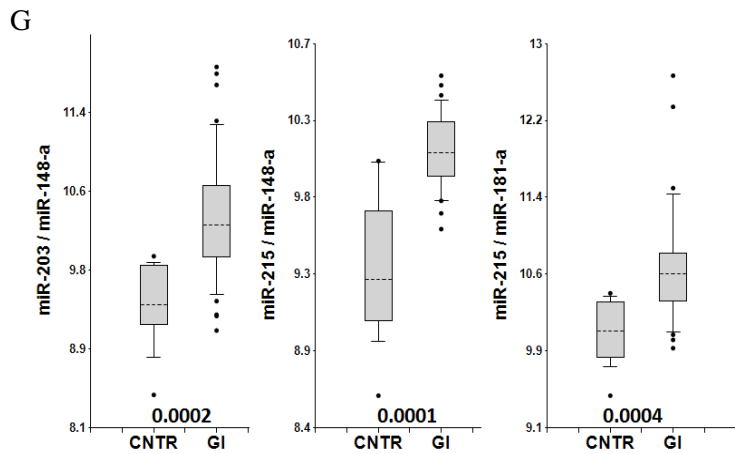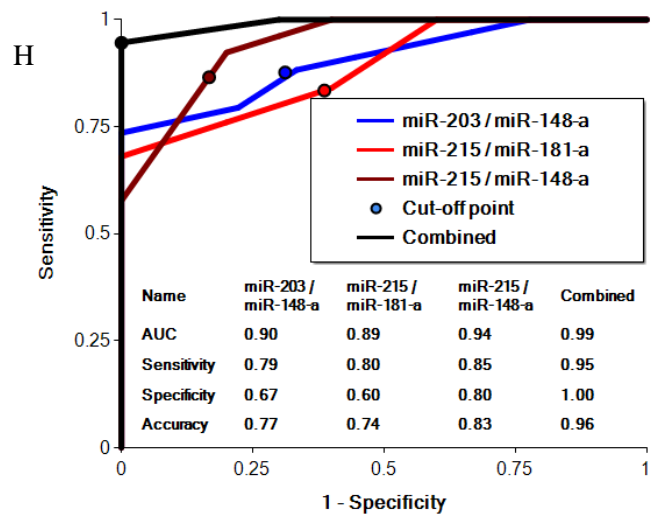

**Figure S1**

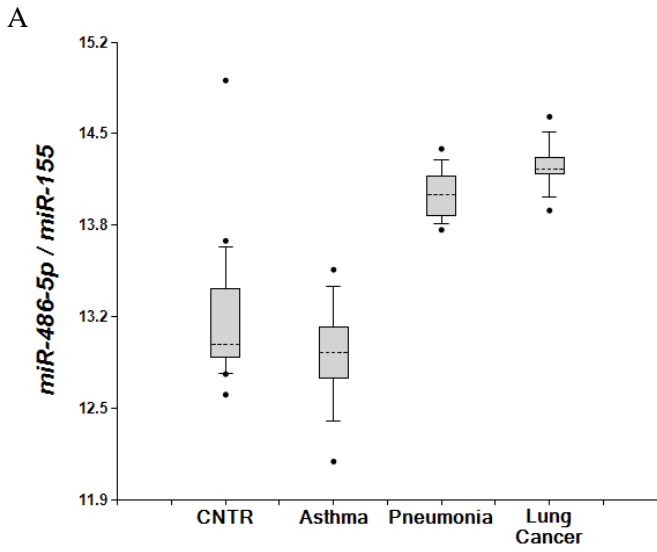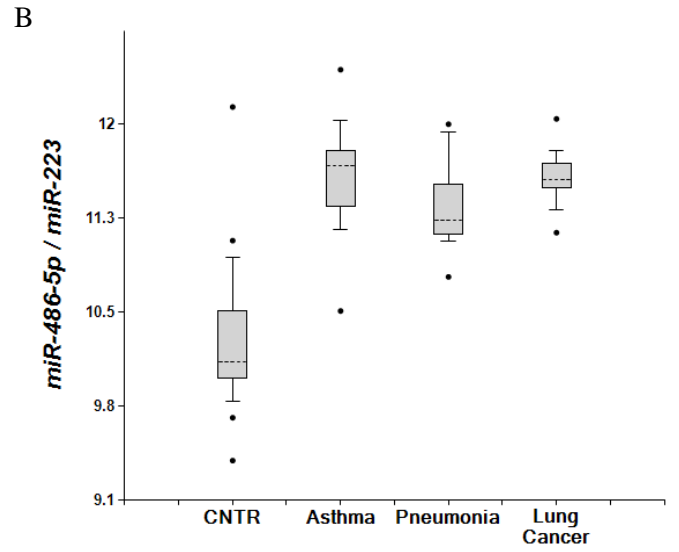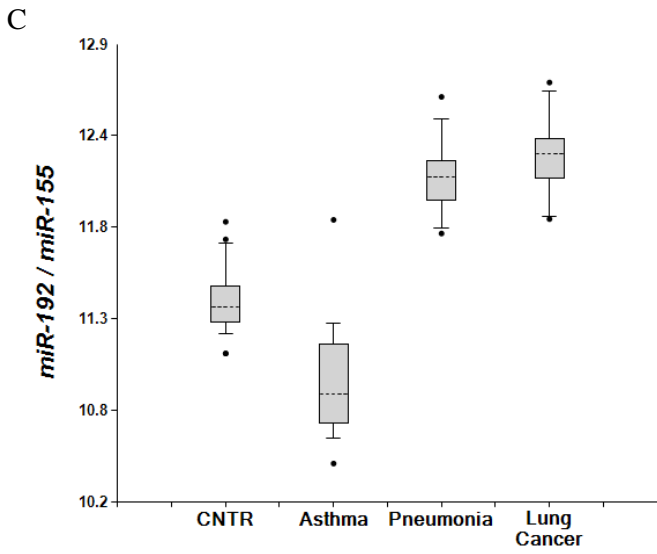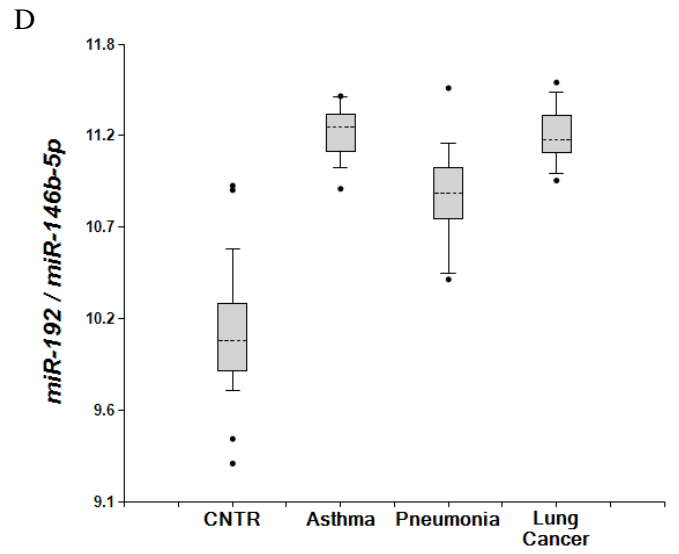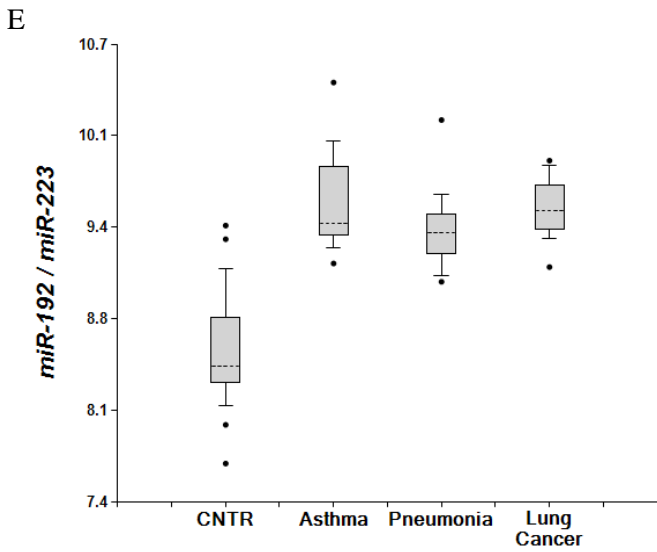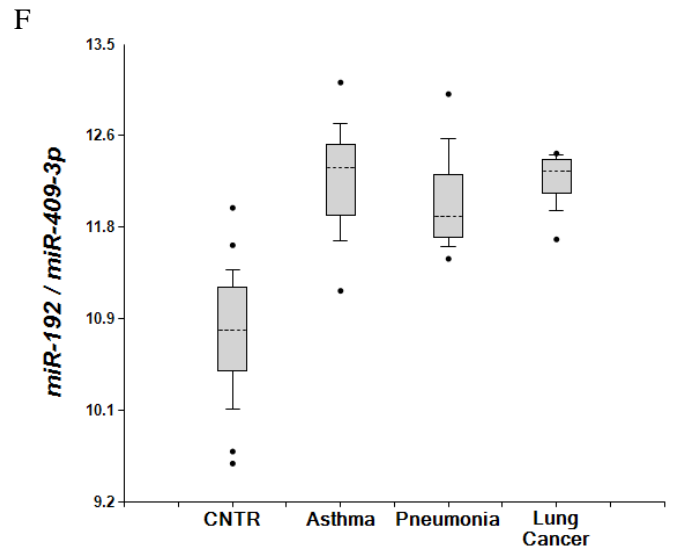

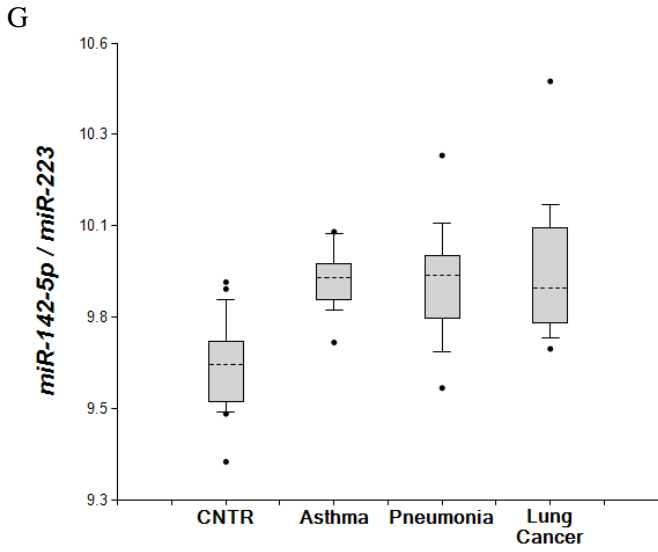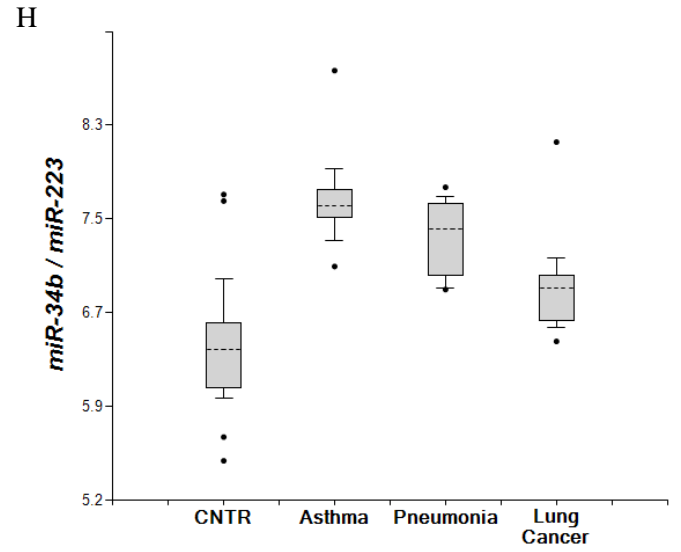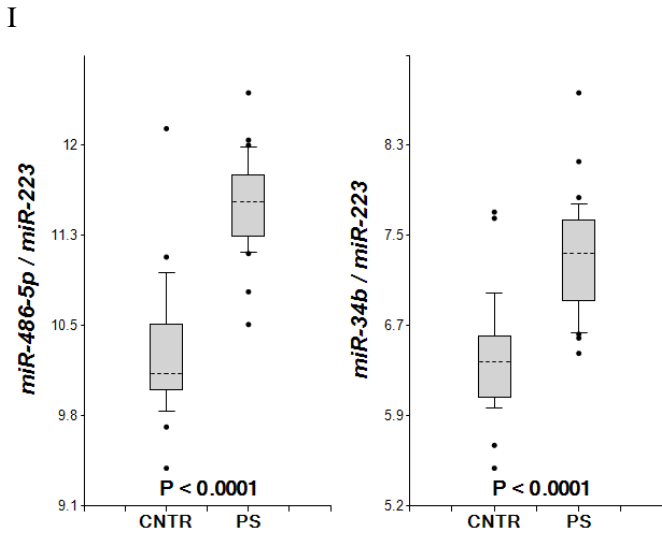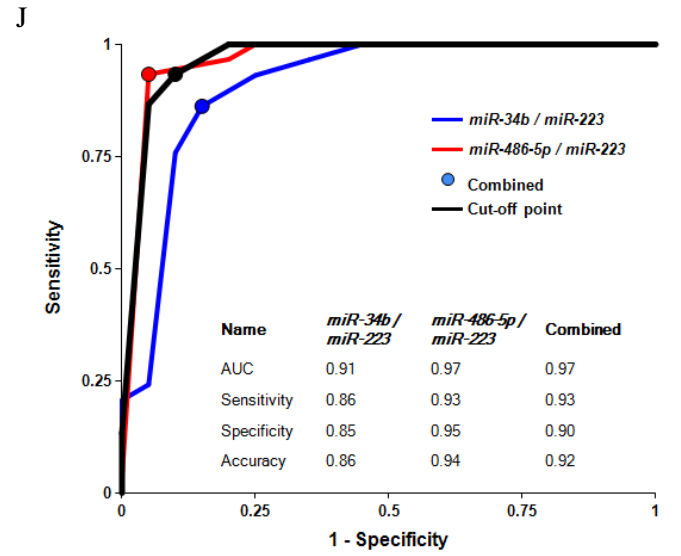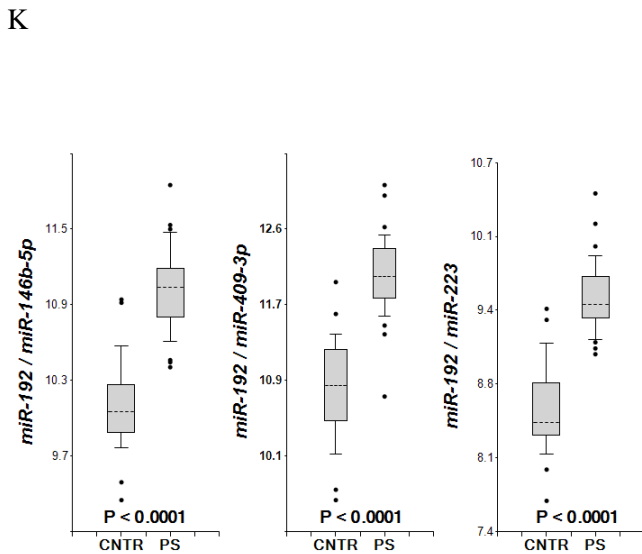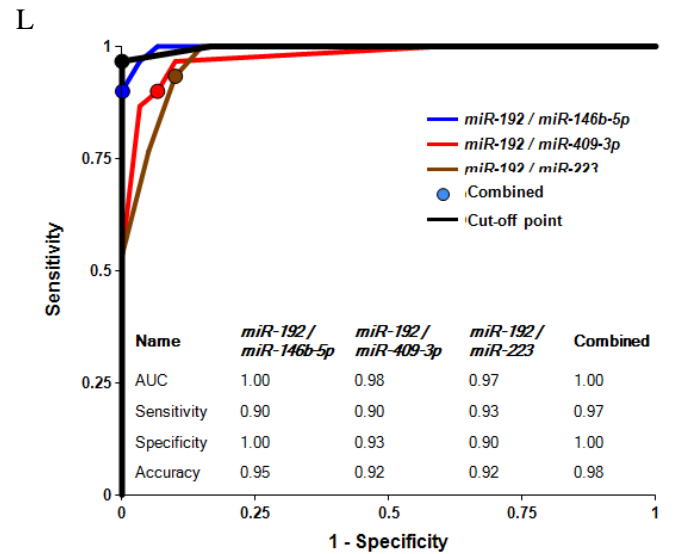

Figure S2

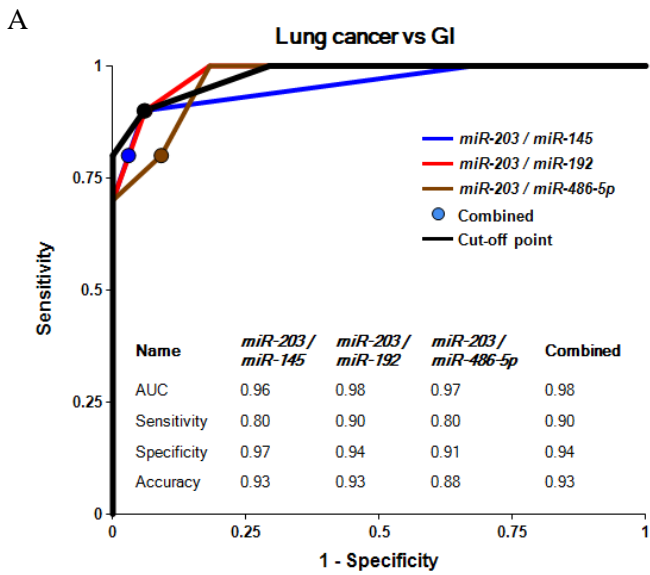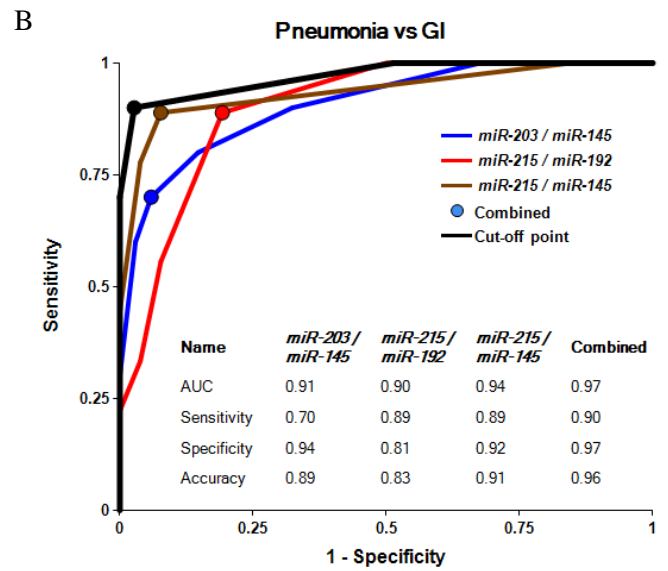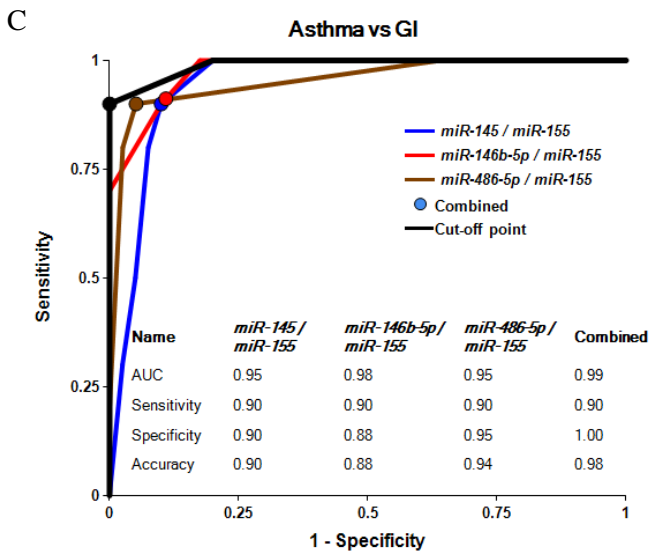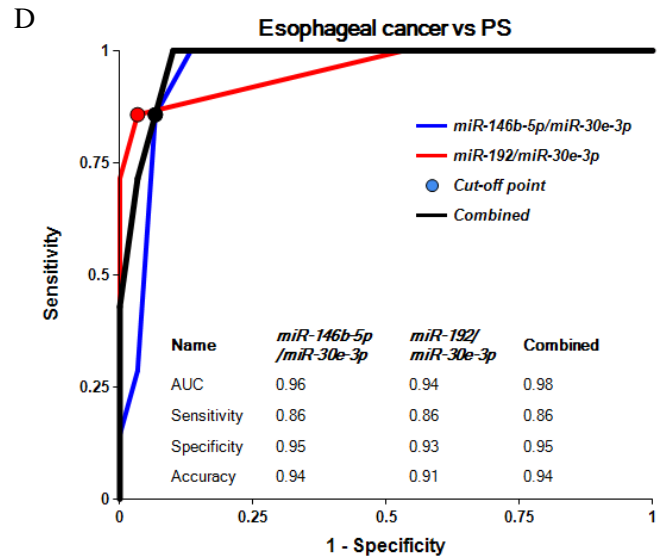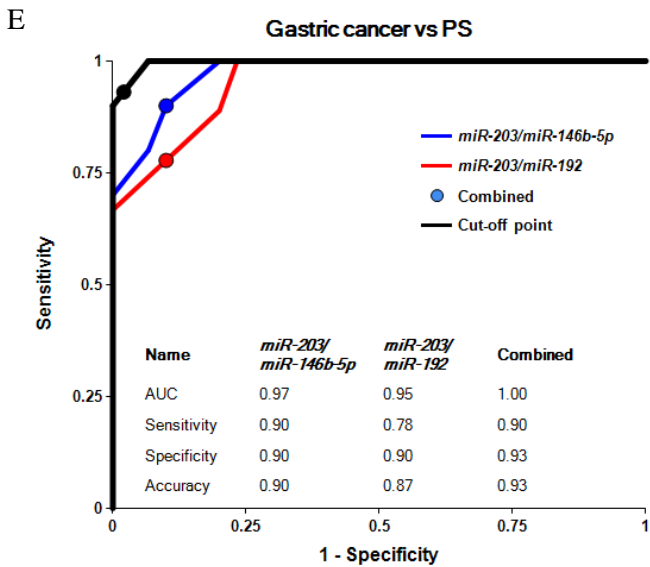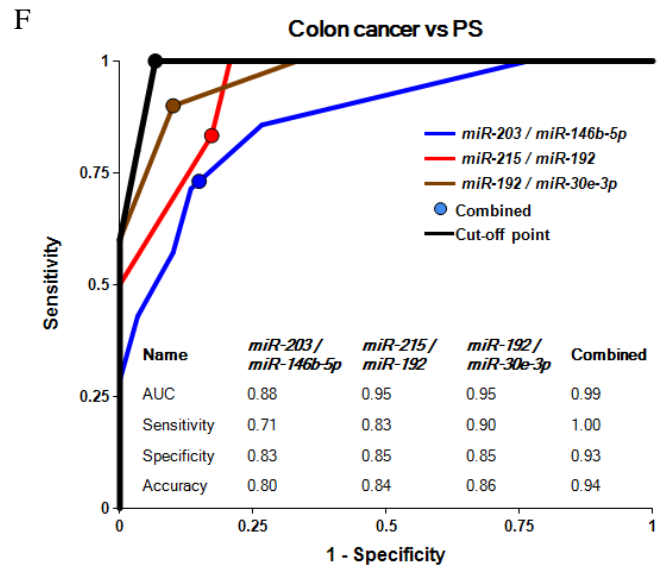

G

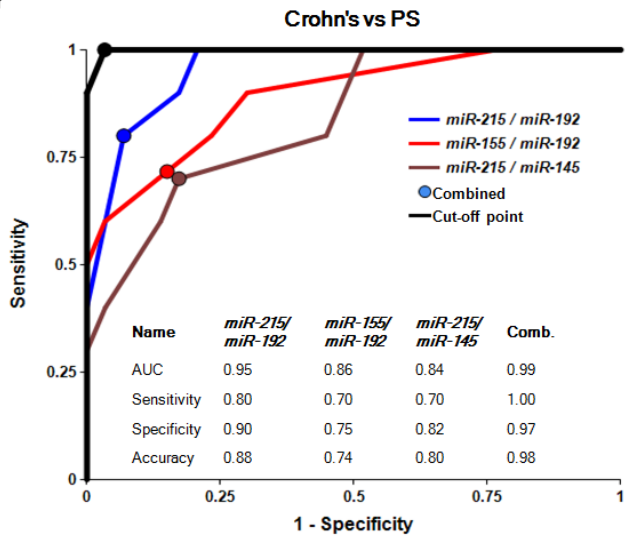

**Figure S3**



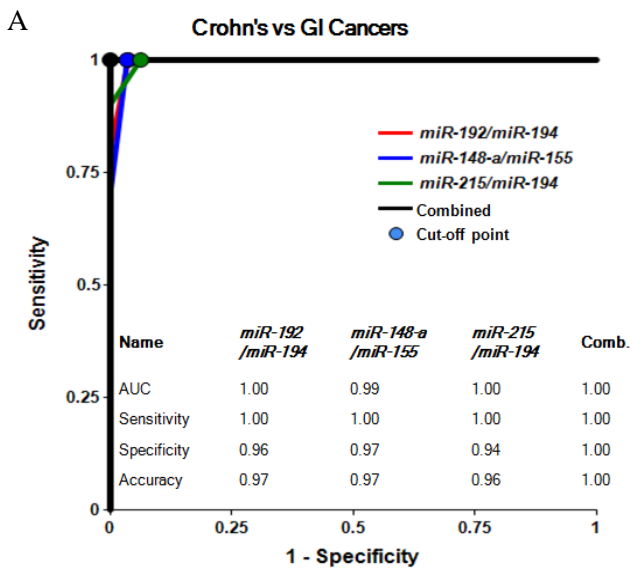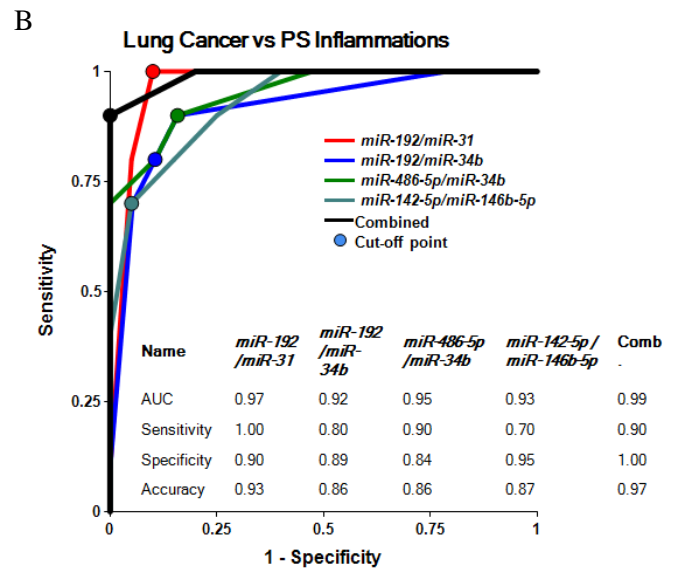

Figure S4
